# Supplementary material for: Neuropathology in the North American sudden unexpected death in epilepsy registry
Source: PubMed Central journal article supplement (PMC8417454; doi:10.1093/braincomms/fcab192), 2021-08-23

## Supplementary materials:

### Supplemental Table 1. Anti-Seizure Medications

### Supplemental Table 2. Neuropathology by Seizure Type

### Supplemental Table 3. Neuropathology by Lifetime GTCS Burden

**Supplemental Figure 1. Case history and correlation analyses.** **A)** Age at death (years) was significantly lower in the total SUDEP group when compared to PWE ( $p = 0.006$ , two-tailed  $t$ -test). When evaluating by the SUDEP subgroups, the definite SUDEP group was significantly younger than the PWE group ( $p = 0.01$ ) and the possible SUDEP group ( $p = 0.02$ , one-way ANOVA Tukey's post-hoc test). The mean is depicted with errors bars representing SEM. **B)** Overall in epilepsy there was a significant positive correlation of age at death (years) and age of epilepsy onset (years,  $p < 0.0001$ ,  $R^2 = 0.2$ , Pearson correlation). When evaluating by COD, there was a significant positive correlation in the total SUDEP group ( $p = 0.0005$ ,  $R^2 = 0.2$ ), no correlation in the PWE group, and no significant difference between the two correlations. **C)** Overall in epilepsy there was a significant positive correlation of age at death (years) and epilepsy duration (years,  $p = 0.0003$ ,  $R^2 = 0.2$ ). When evaluating by COD, there was a significant positive correlation in the PWE group ( $p = 0.04$ ,  $R^2 = 0.2$ ), total SUDEP group ( $p = 0.007$ ,  $R^2 = 0.2$ ), and no significant difference between the two correlations. **D)** Overall in epilepsy, there was a significant negative correlation of brain weight (grams) and age at death ( $p = 0.03$ ,  $R^2 = 0.05$ ). When evaluating by COD, there was no correlation. **E)** Overall in epilepsy, there was no correlation of brain weight (grams) and age of epilepsy onset. When evaluating by COD, there was also no correlation. **F)** Overall in epilepsy, there was no correlation of brain weight (grams) and epilepsy duration. When evaluating by COD, there was a significant negative correlation in the total SUDEP group ( $p = 0.05$ ,  $R^2 = 0.09$ ), no correlation in the PWE group, and no significant difference between the two correlations. The 95% confidence intervals for the Pearson correlations are depicted by dashed lines.

**Supplemental Table 1. Anti-Seizure Medications**

| <b>Study Group</b>  | <b>None</b> | <b>1 ASM</b> | <b>2 ASM</b> | <b>3+ ASM</b> |
|---------------------|-------------|--------------|--------------|---------------|
| PWE                 | 8.7 %       | 26.1 %       | 30.4 %       | 34.8 %        |
| Possible SUDEP      | 25.0        | 75.0         | 0.0          | 0.0           |
| Probable SUDEP      | 0.0         | 50.0         | 33.3         | 16.7          |
| Definite SUDEP      | 16.2        | 32.4         | 35.1         | 16.2          |
| Definite SUDEP plus | 25.0        | 25.0         | 0.0          | 50.0          |
| Total SUDEP*        | 15.7        | 33.3         | 29.4         | 21.6          |

\*Excludes possible SUDEP. Includes cases with known information, n = 78.

**Supplemental Table 2. Neuropathology by Seizure Type**

| <b>Neuropathology Finding</b>          | <b>Focal<br/>(n=16)</b> | <b>Generalized<br/>(n=13)</b> | <b>Mixed<br/>(n=5)</b> |
|----------------------------------------|-------------------------|-------------------------------|------------------------|
| No diagnostic abnormality              | 25.0%                   | 15.4%                         | 0.0%                   |
| FCD IA + IIA                           | <b>43.8</b>             | 38.5                          | <b>40.0</b>            |
| FCD IA                                 | 12.5                    | 15.4                          | 40.0                   |
| FCD IIA                                | 31.3                    | 23.1                          | 0.0                    |
| DGD                                    | 18.8                    | <b>46.2</b>                   | 20.0                   |
| HS                                     | 12.5                    | 0.0                           | <b>40.0</b>            |
| Gliosis                                | 12.5                    | 7.7                           | 0.0                    |
| Heterotopia                            | 12.5                    | 7.7                           | 0.0                    |
| Medullary arcuate nucleus dysgenesis   | 0.0                     | 0.0                           | 0.0                    |
| Medullary olivary dysplasia/hypoplasia | 12.5                    | 0.0                           | 0.0                    |
| Cerebellar dysplasia                   | 6.3                     | 0.0                           | 0.0                    |
| Infarct                                | 12.5                    | 0.0                           | 20.0                   |
| Neuronal loss                          | 0.0                     | 0.0                           | 20.0                   |
| Telangiectasia                         | 6.3                     | 0.0                           | 0.0                    |
| AD-related changes                     | 6.3                     | 7.7                           | 0.0                    |
| Myelin damage                          | 25.0                    | 7.7                           | 20.0                   |
| Acute hypoxic/ischemic changes         | 0.0                     | 0.0                           | 0.0                    |
| Polymicrogyria                         | 6.3                     | 0.0                           | 0.0                    |
| Other                                  | 18.8                    | 7.7                           | 20.0                   |

Bolded are the most frequent percent of findings within each group. Includes cases with known information, n = 34.

**Supplemental Table 3. Neuropathology by Lifetime GTCS Burden**

| <b>Neuropathology Finding</b>          | <b>0<br/>(n=4)</b> | <b>&lt;10<br/>(n=11)</b> | <b>10-100<br/>(n=8)</b> | <b>100-500<br/>(n=7)</b> | <b>&gt;500<br/>(n=4)</b> |
|----------------------------------------|--------------------|--------------------------|-------------------------|--------------------------|--------------------------|
| No diagnostic abnormality              | 25.0%              | 9.1%                     | 0.0%                    | 0.0%                     | <b>50.0%</b>             |
| FCD IA + IIA                           | <b>50.0</b>        | 36.4                     | <b>50.0</b>             | <b>71.4</b>              | 0.0                      |
| FCD IA                                 | 25.0               | 0.0                      | 25.0                    | 14.3                     | 0.0                      |
| FCD IIA                                | 25.0               | 36.4                     | 25.0                    | 57.1                     | 0.0                      |
| DGD                                    | 25.0               | <b>45.5</b>              | 37.5                    | 57.1                     | 25.0                     |
| HS                                     | 0.0                | 9.1                      | 0.0                     | 14.3                     | 0.0                      |
| Gliosis                                | 0.0                | 9.1                      | 0.0                     | 28.6                     | 0.0                      |
| Heterotopia                            | 0.0                | 9.1                      | 12.5                    | 28.6                     | 0.0                      |
| Medullary arcuate nucleus dysgenesis   | 0.0                | 9.1                      | 0.0                     | 0.0                      | 0.0                      |
| Medullary olivary dysplasia/hypoplasia | 0.0                | 18.2                     | 0.0                     | 14.3                     | 0.0                      |
| Cerebellar dysplasia                   | 0.0                | 18.2                     | 0.0                     | 0.0                      | 0.0                      |
| Infarct                                | <b>50.0</b>        | 0.0                      | 0.0                     | 0.0                      | 0.0                      |
| Neuronal loss                          | 0.0                | 9.1                      | 0.0                     | 0.0                      | 0.0                      |
| Telangiectasia                         | 0.0                | 0.0                      | 0.0                     | 0.0                      | 0.0                      |
| AD-related changes                     | 0.0                | 9.1                      | 0.0                     | 14.3                     | 25.0                     |
| Myelin damage                          | 25.0               | 9.1                      | 25.0                    | 28.6                     | 0.0                      |
| Acute hypoxic/ischemic changes         | 0.0                | 9.1                      | 0.0                     | 0.0                      | 0.0                      |
| Polymicrogyria                         | 0.0                | 18.2                     | 0.0                     | 0.0                      | 0.0                      |
| Other                                  | 0.0                | <b>45.5</b>              | 25.0                    | 14.3                     | 0.0                      |

Bolded are the most frequent percent of findings within each group. Includes cases with known information, n = 34.

# Supplementary Figure 1.

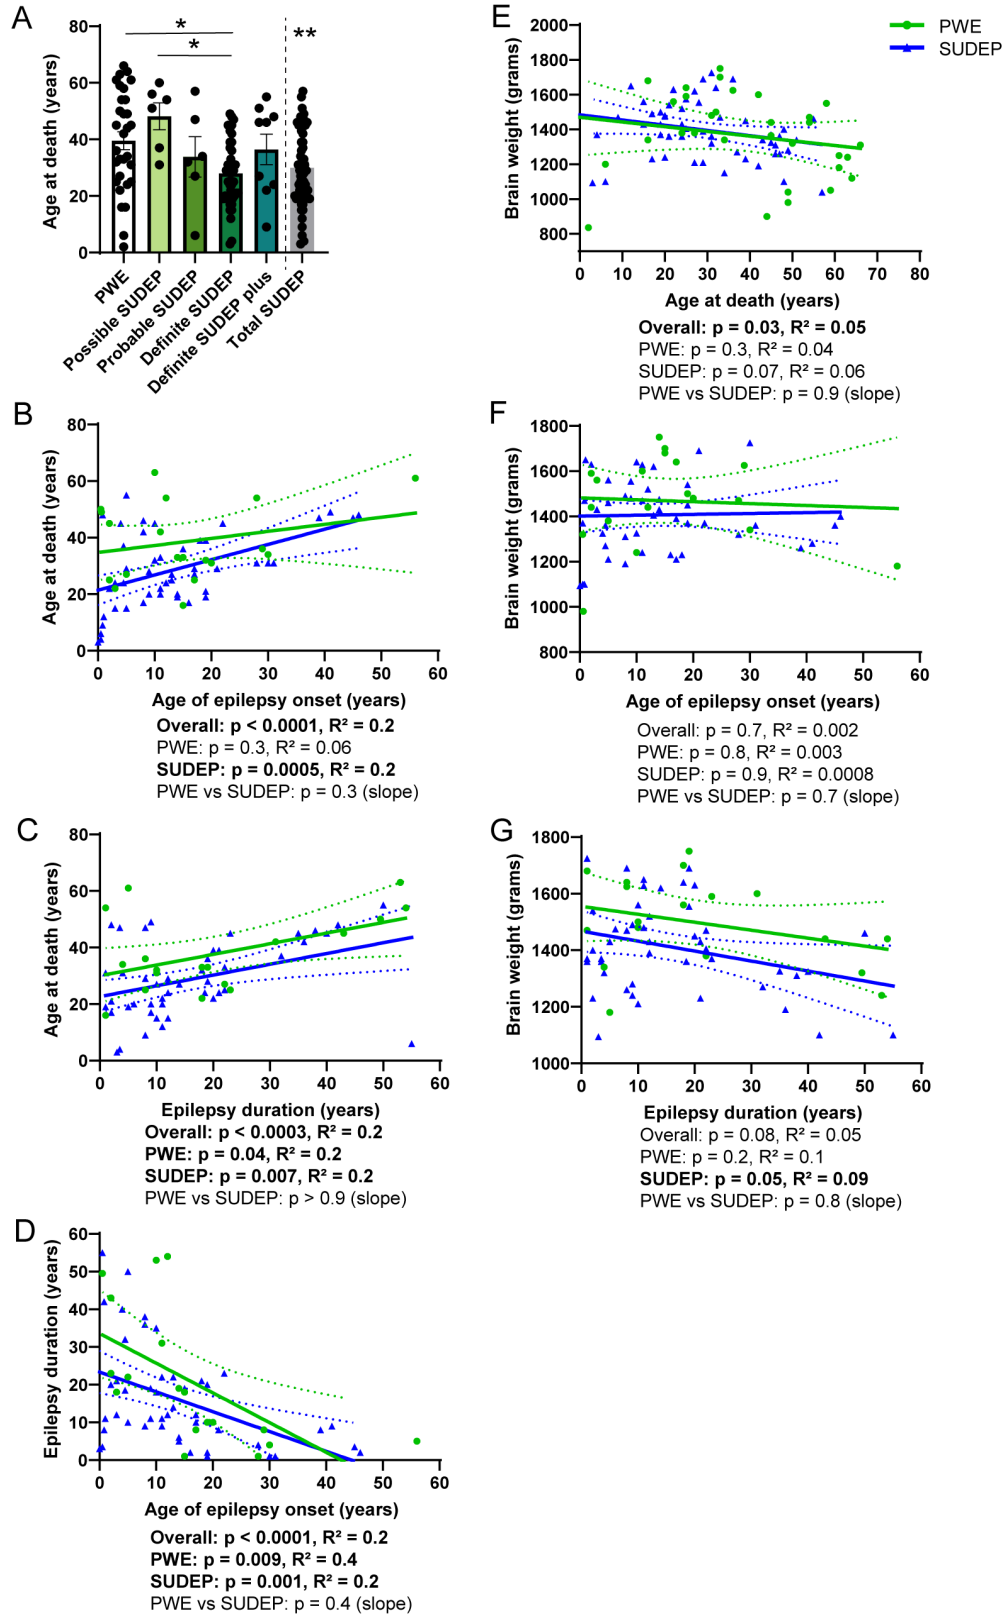

Supplement: fcab192_supplementary_data.pdf [file fcab192_supplementary_data.pdf]
